# Supplementary material for: Differentiation and Structure in Sulfolobus islandicus Rod-Shaped Virus Populations
Source: MDPI journal article supplement (doi:10.3390/v9050120), 2017-05-19
Supplement: s1 [file s1]

**SIRV11**

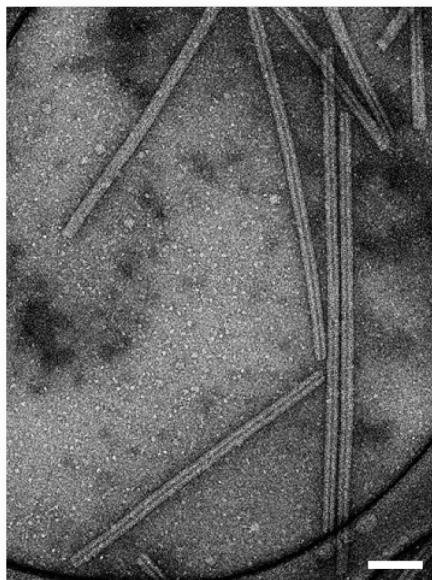

**SIRV4**

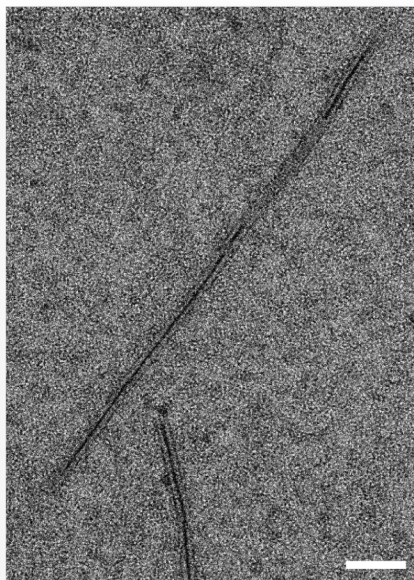

**SIRV6**

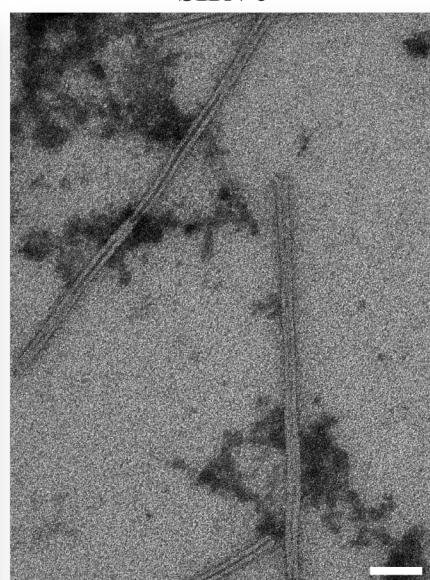

**SIRV7**

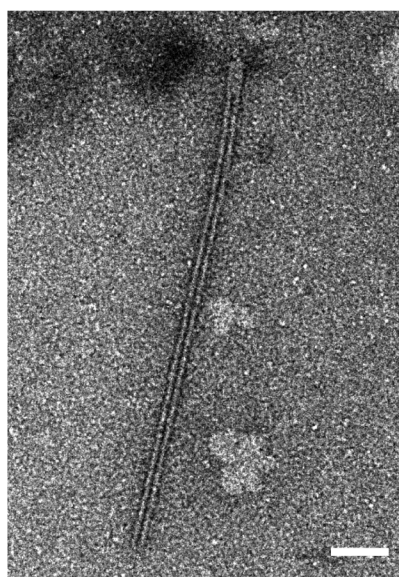

**SIRV9**

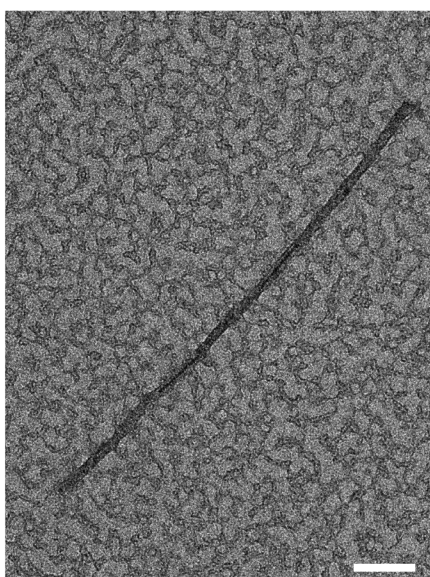

**SIRV10**

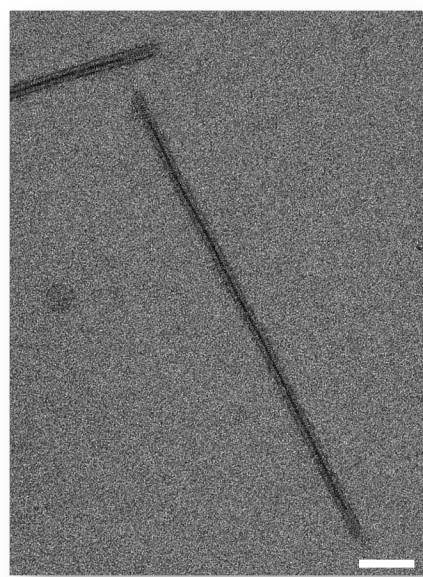

**Figure S1.** Electron Micrographs of SIRVs stained with 2% uranyl acetate. Scale bar 100nm.
