# Supplementary material for: Differentiation and Structure in Sulfolobus islandicus Rod-Shaped Virus Populations
Source: MDPI journal article supplement (doi:10.3390/v9050120), 2017-05-19
Supplement: s1 [file s1]

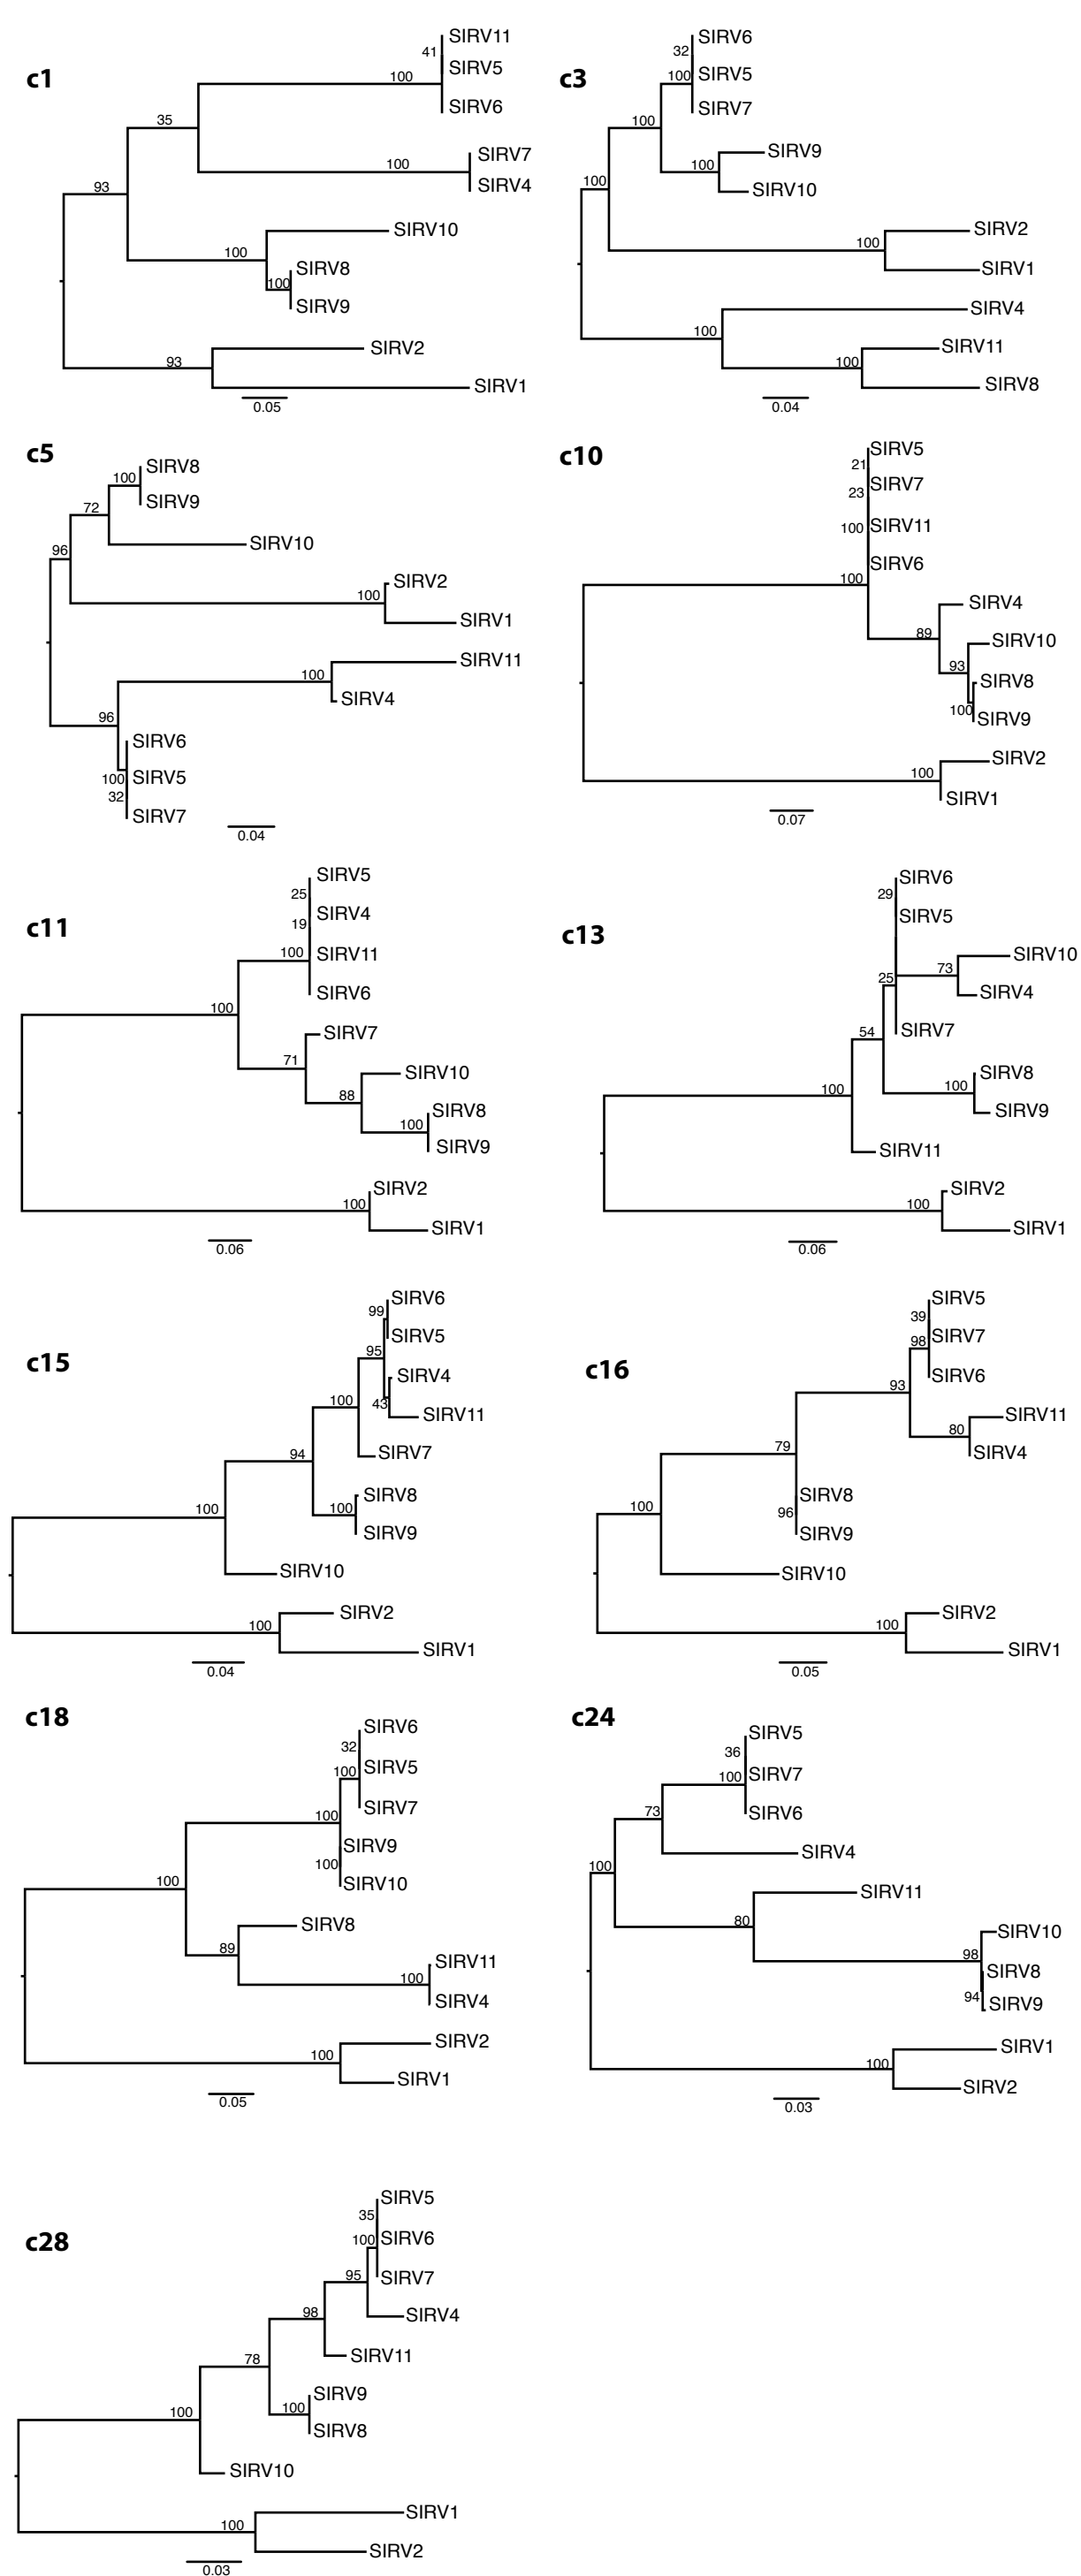

**Figure S3.** Maximum Likelihood phylogenies of individual SIRV core genes with incongruent topologies. Numbers at branches indicate bootstrap support values from Maximum Likelihood as a percent of 100 replicates. Scale bar represents substitutions per site.
