# Supplementary material for: Differentiation and Structure in Sulfolobus islandicus Rod-Shaped Virus Populations
Source: MDPI journal article supplement (doi:10.3390/v9050120), 2017-05-19
Supplement: s1 [file s1]

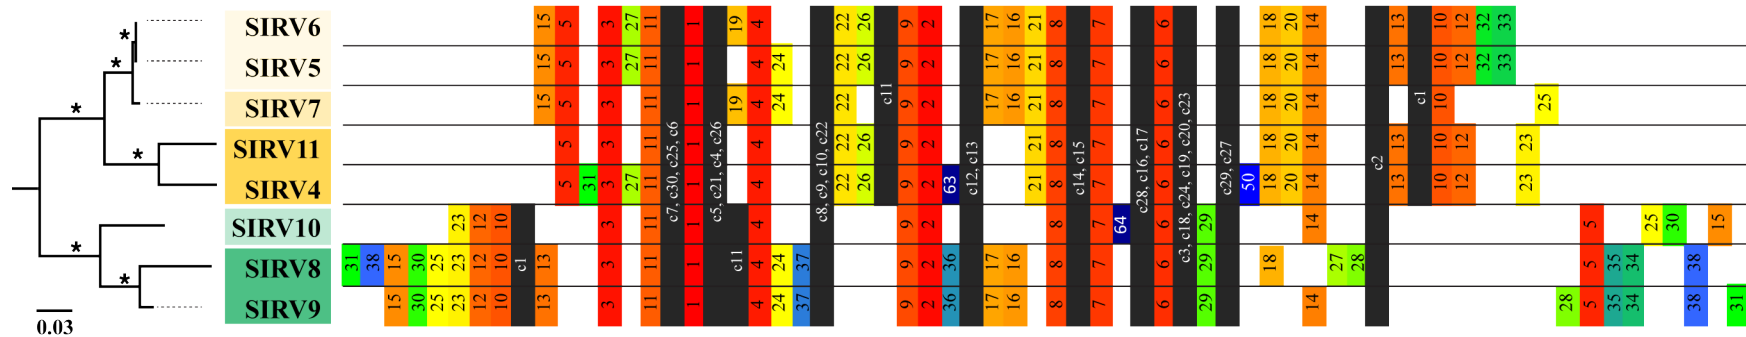

**Figure S4.** Organization of variable gene clusters on Yellowstone SIRVs. Variable gene clusters are shown in order and each column represents a different variable gene cluster. Numbers in boxes correspond to the variable gene cluster they represent and are colored by number. Black bars denote blocks or core genes.
