# Supplementary material for: Differentiation and Structure in Sulfolobus islandicus Rod-Shaped Virus Populations
Source: Viruses. 2017 May 19;9(5):120. doi: 10.3390/v9050120 (PMC5454432; doi:10.3390/v9050120)
Supplement: Supplementary file 1 [file viruses-09-00120-s001.zip]

Archive with 19 entries (16 files):
- Supplementary Materials/
- Supplementary Materials/.DS_Store
- __MACOSX/
- __MACOSX/Supplementary Materials/
- __MACOSX/Supplementary Materials/._.DS_Store
- Supplementary Materials/Figure S1.pdf
- __MACOSX/Supplementary Materials/._Figure S1.pdf
- Supplementary Materials/Figure S2.pdf
- __MACOSX/Supplementary Materials/._Figure S2.pdf
- Supplementary Materials/Figure S3.pdf
- __MACOSX/Supplementary Materials/._Figure S3.pdf
- Supplementary Materials/Figure S4.pdf
- __MACOSX/Supplementary Materials/._Figure S4.pdf
- Supplementary Materials/Figure S5.pdf
- __MACOSX/Supplementary Materials/._Figure S5.pdf
- Supplementary Materials/Figure S6.pdf
- __MACOSX/Supplementary Materials/._Figure S6.pdf
- Supplementary Materials/Supplementary Tables.xlsx
- __MACOSX/Supplementary Materials/._Supplementary Tables.xlsx
