# Supplementary material for: Differentiation and Structure in Sulfolobus islandicus Rod-Shaped Virus Populations
Source: Viruses. 2017 May 19;9(5):120. doi: 10.3390/v9050120 (PMC5454432; doi:10.3390/v9050120)
Supplement: Supplementary file 1 [file viruses-09-00120-s001.zip › Supplementary Materials/Supplementary Tables.xlsx]

## Sheet: Table S1
Table S1. Environmental sample collection
		Spring Coordinates	Sample Name	Date collected	pH	Temperature (⁰C)	Virus Isolated	Isolates
Yellowstone National Park (USA)	Norris Geyser Basin	Lat: 44⁰ 43' 41.5" N Long: 110⁰ 42' 47.7" W	NG04.C01.E1	6.2.10	2.54	63.5	SIRV8	Yes
			NG04.C07.E1, NG04.C07.E2	7.28.10	2.47	66.1		No
			NG04.C09.E1, NG04.C09.E2	8.17.10	2.36	65.4	SIRV9	No
			NG04.C11.E1, NG04.C11.E2	9.06.10	2.3	58		No
			NG04.C19.E2	9.19.10	2	58.6		No
			NG04.C23.E2	9.21.10	2	62.7		No
		Lat: 44⁰ 43' 39.0" N Long: 110⁰ 42' 51.7" W	NG05.C01.E1	6.02.10	4.2	54.8		Yes
			NG05.C03.E1	6.16.10	3.42	58.6		No
			NG05.C07.E1	6.28.10	3.45	59.3		Yes
			NG05.C11.E1	7.15.10	3.53	56.9		Yes
			NG05.C13.E1, NG05.C13.E2	7.21.10	3.53	59.4		Yes
			NG05.C19.E1, NG05.C19.E2	9.6.10	2.58	58.1	SIRV10	Yes
			NG05.C21.E1, NG05.C21.E2	9.16.10	2.56	56.6		Yes
			NG05.C27.E1, NG05.C27.E2	9.19.10	3.5	54.2		No
			NG05.C31.E2	9.21.10	3	59		No
			NG05.C33.E2	9.22.10	3	59.1		No
		Lat: 44⁰ 43' 39.4" N Long: 110⁰ 42' 52" W	NG06.C02.E1	6.02.10	2.52	50.1		No
			NG06.C09.E1	7.07.10	2.42	71.8		Yes
			NG06.C13.E1, NG06.C13.E2	7.21.10	2.56	80		No
			NG06.C15.E1, NG06.C15.E2	7.28.10	2.51	73.6		Yes
			NG06.C17.E1	8.17.10	2.24	64.2		No
			NG06.C19.E1, NG06.C19 .E2	9.6.10	2.5	71.4		No
		Lat: 44⁰ 43.734' N Long: 110⁰ 42.742 W	NG08.C05.E1, NG08.C05.E2	9.21.10	2.75	52.5		No
		Lat: 44⁰ 43' 44.1" N Long: 110⁰ 42' 45.0" W	NG12.C02.E1	5.31.10	2.41	78.4		No
		Lat: 44⁰ 43' 43.6" N Long: 110⁰ 42' 40.1" W	NG16.C02.E2	6.01.10	2.96	84.6		No
			NG16.C03.E1	6.16.10	3.09	86.2		No
			NG16.C17.E1, NG16.C17.E2	8.17.10	3	82		No
			NG16.C19.E1, NG16.C19.E2	9.06.10	3.05	79		No
		Lat: 44⁰ 43' 43.6" N Long: 110⁰ 42' 40.1" W	NG19.C02.E1	6.02.10	3.6	54.1		No
		Lat: 44⁰ 43' 43.3" N Long: 110⁰ 42' 43.1" W	NG22.C05.E1, NG22.C05 .E2	9.20.10	3.33	82.2		No
	Nymph Lake	Lat: 44⁰ 45' 7.0" N Long: 110⁰ 43' 43.4" W	NL01.C00.E1	6.05.10	6.7	89.5		Yes
			NL01.C02.E1
			NL01.C03.E1	6.16.10	6.56	89		Yes
			NL01.C05.E1	6.22.10	6.65	88.4		Yes
			NL01.C09.E1	7.07.10	5.08	91.3		No
			NL01.C21.E1, NL01.C21.E2	9.16.10	3.3	90.2		No
			NL01.C23.E1, NL01.C21.E2	9.17.10	3	89.6	SIRV11	No
			NL01.C27.E1, NL01.C27.E2	9.19.10	3.25	86.5		No
			NL01.C31.E1 , NL01.C31.E2	9.21.10	3.5	87.5		No
			NL01.C33.E1, NL01.C33.E2	9.22.10	3.5	89	SIRV4	No
		Lat: 44⁰ 45' 7.7" N Long: 110⁰ 43' 42.8" W	NL03.C02.E1	6.05.10	3.13	84		No
			NL03.C03.E1	6.16.10	2.63	84.6		Yes
			NL03.C05.E1	6.22.10	2.47	85.6		No
			NL03.C07.E1	6.28.10	2.49	86.4		No
			NL03.C09.E1	7.07.10	2.32	85.8		Yes
			NL03.C15.E1, NL03.C15.E2	7.28.10	2.32	86.3		No
			NL03.C17.E1, NL03.C17.E2	8.17.10	2.35	84.5		No
			NL03.C19.E1, NL03.C19.E2	9.6.10	2.45	84.8		No
			NL03.C23.E1	9.17.10	2	85.5		No
			NL03.C25.E1	9.18.10	2	85		No
			NL03.C27.E1	9.19.10	2.37	80.1		No
			NL03.C29.E1	9.26.10	2	83.8		No
			NL03.C31.E1	9.21.10	2	84		No
		Lat: 44⁰ 45' 7.1" N Long: 110⁰ 43' 42.7" W	NL10.C00.E1	6.5.10	3.85	77.9		Yes
			NL10.C02.E1	6.5.10	3.85	77.9		Yes
			NL10.C03.E1	6.6.10	2.69	80		Yes
			NL10.C05.E1	6.22.10	2.49	83.3		Yes
			NL10.C07.E1, NL10.C07.E2	6.28.10	2.48	84.5		No
			NL10.C19.E1, NL10.C19.E2	9.6.10	2.33	83.3		No
			NL10.C21.E1, NL10.C21.E2	9.16.10	2.37	82.6		Yes
			NL10.C23.E1, NL10.C23.E2	9.17.10	2	79.2		No
			NL10.C25.E1, NL10.C25.E2	9.18.10	2.31	80		No
			NL10.C27.E1, NL10.C27.E2	9.19.10	2.34	73		No
			NL10.C29.E1, NL10.C29.E2	9.20.10	2.5	78.3		No
			NL10.C31.E1, NL10.C31.E2	9.21.10	2	78		Yes
			NL10.C33.E1, NL10.C33.E2	9.22.10	2	78.3		Yes
		Lat: 44⁰ 45' 07.5" N Long: 110⁰ 43' 42.8" W	NL13.C02.E1	6.05.10	4	90		Yes
			NL13.C03.E1	6.16.10	2.56	80.7		Yes
			NL13.C06.E1	6.22.10	2.47	74.4		Yes
			NL13.C07.E1	6.28.10	2.45	79.8		Yes
			NL13.C09.E1, NL13.C09.E2	7.7.10	2.28	78.6		No
			NL13.C12.E1	7.15.10	2.42	78.6		No
			NL13.C13.E1	7.21.10	2.34	79.9		No
			NL13.C15.E1	7.28.10	2.31	88.2		Yes
			NL13.C19.E1, NL13.C19.E2	9.6.10	2.47	87.4	SIRV5	No
			NL13.C21.E1, NL13.C21.E2	9.16.10	2	81.5		No
			NL13.C23.E1, NL13.C23.E2	9.17.10	2	81	SIRV6	No
			NL13.C25.E1, NL13.C25.E2	9.18.10	2.5	79.8		No
			NL13.C27.E1, NL13.C27.E2	9.19.10	2.31	77.5		No
			NL13.C29.E1, NL13.C29.E2	9.20.10	2	76.6		No
			NL13.C32.E1, NL13.C32.E2	9.21.10	2.37	78.3		No
			NL13.C33.E1, NL13.C33.E2	9.22.10	2	80.4		No
		Lat: 44⁰ 45' 7.56" N Long: 110⁰ 43' 42.9" W	NL14.C17.E1, NL14.C17.E2	8.17.10	2.41	89	SIRV7	No
	Gibbon Geyser Basin	Lat: 44⁰ 41' 25.6" Long: 110⁰ 43' 46.4"	GG01.C03.E1	7.23.10	2.24	72.6		No
		Lat: 44⁰ 41' 21.8" Long: 110⁰ 43' 43.7"	GG08.C01.E1	6.24.10	2.84	60.4		No
		Lat: 44⁰ 41' 21.8" Long: 110⁰ 43' 43.7"	GG08.C03.E1, GG08.C03.E2	7.23.10	2.73	62.7		Yes
		Lat: 44⁰ 41' 21.8" Long: 110⁰ 43' 43.7"	GG08.C05.E1, GG08.C05.E2	9.17.10	2.85	58.9		No
		Lat: 44⁰ 41' 25.5" Long: 110⁰ 43' 44.2"	GG09.C01.E1	6.24.10	2.94	90.5		No
	Crater Hills	Lat: 44⁰ 39' 15.4" Long: 110⁰ 29' 01.9"	CH09.C02.E1	6.4.10	3.07	71		Yes
		Lat: 44⁰ 39' 13.8" Long: 110⁰ 28' 40.3"	CH13.C02.E1	6.4.10	1.79	78.8		No
	Sylvan Springs	Lat: 44⁰ 41' 57.7" N Long: 110⁰ 46' 01.9" W	Sy104.C02.E1	6.6.10	5.61	79.4		Yes
		Lat: 44⁰ 41' 57.7" N Long: 110⁰ 46' 01.9" W	Sy105.C02.E1	6.6.11	6.61	79.4		No
	Ampitheater Springs	ND	Amp02.C05.E1	9.18.10	2.11	88.9		No
	Sulphur Cauldron	Lat: 44⁰ 45' 07.5" N Long: 110⁰ 43' 42.8" W	SC02.C03.E1	6.30.10	1.91	76.8		Yes
Kamchatka Peninsula (Russia)	Mutnovsky Volcano	Lat: 52⁰ 31' 48.7" Long: 158⁰ 11' 29.9"	MP01, MP01.E1, MP01.E2, MP01.E3	8.17.10	3.98	93.5		Yes
		Lat: 52⁰ 31' 48.6" Long: 158⁰ 11' 29.8"	MP03, MP03.E1, MP03.E2, MP03.E3	8.17.10	2.76	71.8		Yes
		Lat: 52⁰ 31' 48.5" Long: 158⁰ 11' 28.6"	MP04, MP04.E1, MP04.E2, MP04.E3	8.17.10	2.98	92.2		Yes
		Lat: 52⁰ 31' 48.2" Long: 158⁰ 11' 29.2"	MP05, MP05.E1, MP05.E2, MP05.E3	8.17.10	2.5	81		Yes
		Lat: 52⁰ 32' 08.6" Long: 158⁰ 11' 52.4"	MP06, MP06.E1, MP06.E2, MP06.E3	8.17.10	3.2	78		Yes

## Sheet: Table S2
	Table S2. Host strain panel for virus purification
			Strain name	Spring Coordinates	Date collected	pH	Temperature (⁰C)	Reference	Viruses purified
	Yellowstone	Norris Geyser Basin	Y08.82.36	Lat: 44⁰ 43' 39.4" N Long: 110⁰ 42' 52" W	9.16.08	ND	ND	[31]	SIRV11, SIRV6
			NG05.06.02.C01	Lat: 44⁰ 43' 39.0" N Long: 110⁰ 42' 51.7" W	6.02.10	4.2	54.8	This study	-
		Crater Hills	CH09.C02.E08	Lat: 44⁰ 39' 15.4" Long: 110⁰ 29' 01.9"	6.4.10	3.07	71	This study	-
		Sulphur Cauldron	SC02.C03.E05	Lat: 44⁰ 45' 07.5" N Long: 110⁰ 43' 42.8" W	6.30.10	1.91	76.8	This study	-
		Nymph Lake	NL10.C31.E08	Lat: 44⁰ 45' 7.1" N Long: 110⁰ 43' 42.7" W	9.21.10	2	78	This study	SIRV5
	Kamchatka	Mutnovsky Volcano	MP01.DTO.01	Lat: 52⁰ 31' 48.7" Long: 158⁰ 11' 29.9"	8.17.10	3.98	92.4	This study	-
			MP02.DT.30	Lat: 52⁰ 31' 48.7" Long: 158⁰ 11' 29.8"	8.17.11	2.79	93.5	This study	-
			MP03.DT.16	Lat: 52⁰ 31' 48.6" Long: 158⁰ 11' 29.8"	8.17.10	2.76	71.8	This study	-
			M.16.30	-	-	2	76	[50]	SIRV7
			M.16.4	-	-	2	76	[35]	SIRV8, SIRV9, SIRV10
			M.16.27	-	-	2	76	[35]	SIRV4

## Sheet: Table S3
	Table S3. Length, coverage , GC content and spacer match coverage of SIRVs
		Genome Length	Coverage		GC content (%)	Spacer Coverage (%) a
			Average	Stdev		Core	Variable	Non-coding
	SIRV1	32308 a	-	-	25.3	41.7943	37.0142	58.2903
	SIRV2	35450 b	-	-	25.2	38.604	35.8447	54.8426
	SIRV11	33346*	574	246	27.3	40.1828	34.9371	59.6563
	SIRV4	35035*	893.1	534.6	25.6	40.6695	37.0766	60.9861
	SIRV5	36306*	699.3	311.3	25.4	42.4012	37.5143	62.0956
	SIRV6	35439*	97.5	40.7	26.7	42.5371	40.8716	56.9875
	SIRV7	34190*	268	92	26.6	42.4398	37.2558	61.34
	SIRV8	36493*	148	85.1	26.8	40.6418	36.5577	56.2159
	SIRV9	36391*	685.1	380.7	26.9	40.7043	33.5606	59.857
	SIRV10	32735*	130	47.3	26.6	42.6368	36.6071	59.0747
	* Length of near complete genome with partial sequence of inverted terminal repeats.
	a bp matched by spacer per bp coverable

## Sheet: Table S4.
Table S4. SIRV core gene clusters
		SIRV2 ORF name a	Annotation/Predicted function b	Homologs in other archaeal viruses	Reference
Core Clusters	c1	ORF83a/ORF83b	DNA binding, HTH		[23, 56]
	c2	ORF249	Hypothetical protein (PHA01625)		CD-search
	c3	ORF564	Structural protein in other rudiviruses (ARV, SRV,SIRVs)		[54]
	c4	ORF56b	Transcrptional regulator SvtR DNA binding, RHH		[24, 56]
	c5	ORF119c	Replication initiation protein		[23, 56]
	c6	ORF131b	ssDNA binding protein		[23, 56]
	c7	ORF84a	Hypothetical protein (PHA02770)		CD-search
	c8	ORF103c	Hypothetical protein (PHA02767)		[25]
	c9	ORF134	Major Capsid Protein	Structural protein in other rudiviruses (ARV, SRV)	[53, 56]
	c10	ORF56	Hypothetical protein (PHA02768)		CD-search
	c11	-	-		CD-search
	c12	ORF84c	Hypothetical protein (PHA01750)		CD-search
	c13	ORF110	Hypothetical protein (PHA01751)		CD-search
	c14	ORF488	Structural protein in other rudiviruses (ARV, SRV,SIRVs)		[54]
	c15	ORF154	Hypothetical protein (PHA02769)		CD-search
	c16	ORF69	Hypothetical protein (PHA01754)		CD-search
	c17	ORF1070	Viral structural protein gp30	Structural protein in other rudiviruses (ARV, SRV)	[56]
	c18	ORF309	Hypothetical protein (PHA01366)		CD-search
	c19	ORF269	Hypothetical protein (PHA01756)		CD-search
	c20	ORF176	Hypothetical protein (PHA01631)		CD-search
	c21	ORF98	Virus associated pyramid protein		[18]
	c22	ORF335	Glycosyl transferase group 1	In other rudiviruses (ARV, SRV)	[55]
	c23	ORF356	Glycosyl transferase group 1	Inother rudiviruses (ARV, SRV)	[55]
	c24	ORF158a	S-adenosylmethionine-dependent methyltransferase	In other rudiviruses (ARV, SRV) and lipothrixiviruses (SIFV)	[55]
	c25	ORF436	ssDNA annealing	In other rudiviruses (ARV, SRV) and lipothrixiviruses (AFV1,AFV2)	[25,55]
	c26	ORF59b	Ribbon-helix-helix protein, copG family		[55]
	c27	ORF310	tRNA-guanine transglycosilase	In SRV and STSV1	[55]
	c28	ORF121	Archaeal holliday junction resolvase	In other rudiviruses (ARV, SRV)	[55]
	c29	ORF399	11 transmembrane regions	SRV	[55]
	c30	ORF207	Exo- and endonuclease (CRISPR-associated Cas4-like protein)	In other rudiviruses (ARV, SRV) and and some lipothrixiviruses (AFV1,SIFV)	[25,55]
	a Name of corresponding ORFs in the SIRV type strain SIRV2 (if present) as described in [22] is shown. Some ORFs vary slightly from original prediction.
	b CD-Search specific and non-specific hits are shown if at least one of the cluster members has any significant matches. Non-specific hits meet or exceed the RPS-BLAST threshold for statistical significance using the default E-value cutoff of 0.01.
	SRV( Stygiolobus rod-shaped virus), ARV (Acidianus rod-shaped virus), SIFV(Sulfolobus islandicus filamentous virus), AFV (Acidianus filamentous virus), STSV (Sulfolobus tengchongensis spindle-shaped virus )

## Sheet: Table S5
	Table S5. Estimates of synonymous vs. non-synonymous substitutions and evolutionary divergence between sequences of each of the 30 SIRV core clusters.
			PN/PS							Average Pairwise genetic distance
			All			YN Only				All	Within Groups		Between Groups
			PN/PS (Average)	Max	Stdev	PN/PS (Average)	Max	Stdev			YN	Iceland
	Core Clusters	c1	0.383769	0.567572	0.0683442	0.363982	0.421391	0.0399768		0.44	0.37	0.43	0.58
		c2	0.409786	0.65721	0.166971	0.299978	0.622302	0.0978258		0.34	0.11	0.43	0.74
		c3	0.466425	0.669748	0.15749	0.451437	0.629612	0.167738		0.3	0.25	0.15	0.4
		c4	0.286112	0.438445	0.107641	0.243036	0.369027	0.106866		0.33	0.23	0.18	0.52
		c5	0.349287	0.614099	0.111566	0.292608	0.614099	0.0882515		0.21	0.16	0.06	0.3
		c6	0.22007	0.381089	0.0685995	0.21374	0.381089	0.0826297		0.22	0.16	0.15	0.32
		c7	0.670128	0.899529	0.204241	0.511021	0.743056	0.0888814		0.25	0.05	0.15	0.62
		c8	0.509685	0.784019	0.207907	0.439072	0.682124	0.2248		0.29	0.19	0.12	0.48
		c9	0.147134	0.236324	0.0617105	0.101349	0.15311	0.0365509		0.17	0.11	0.17	0.29
		c10	0.475173	0.759743	0.19154	0.33911	0.41821	0.0831876		0.24	0.1	0.08	0.49
		c11	0.419122	0.721959	0.159312	0.311702	0.432829	0.0672994		0.38	0.2	0.08	0.7
		c12	0.174047	0.416	0.0855726	0.121081	0.165385	0.0361008		0.17	0.12	0.13	0.26
		c13	0.250334	0.479788	0.138345	0.151711	0.246862	0.0461016		0.21	0.1	0.08	0.39
		c14	0.259668	0.771429	0.13275	0.227976	0.771429	0.15811		0.17	0.11	0.09	0.28
		c15	0.248566	0.379883	0.0958334	0.190248	0.358333	0.0685142		0.16	0.07	0.13	0.31
		c16	0.23353	0.493997	0.100922	0.211085	0.493997	0.115474		0.2	0.13	0.11	0.35
		c17	0.244544	0.348024	0.075255	0.191038	0.228288	0.012743		0.17	0.09	0.11	0.31
		c18	0.495866	0.682435	0.174566	0.395926	0.531382	0.162183		0.31	0.2	0.15	0.5
		c19	0.270091	0.445589	0.106984	0.200543	0.288981	0.0596687		0.24	0.15	0.13	0.39
		c20	0.276962	0.451854	0.0901552	0.229472	0.293869	0.0615877		0.18	0.11	0.08	0.29
		c21	0.355913	0.562236	0.128052	0.276618	0.416296	0.0990006		0.29	0.21	0.15	0.44
		c22	0.214713	0.354357	0.0919646	0.160679	0.247507	0.0657947		0.18	0.11	0.06	0.32
		c23	0.205163	0.300663	0.0571276	0.167927	0.24581	0.0323005		0.16	0.11	0.11	0.25
		c24	0.20104	0.315175	0.0600263	0.159612	0.211165	0.0244675		0.17	0.1	0.12	0.28
		c25	0.184919	0.269796	0.0516234	0.168398	0.212963	0.0481436		0.17	0.14	0.09	0.22
		c26	0.176198	0.28185	0.0737089	0.123858	0.211155	0.0228533		0.15	0.09	0.09	0.27
		c27	0.45022	0.755687	0.15448	0.37497	0.480888	0.0740008		0.38	0.24	0.18	0.62
		c28	0.263651	0.390314	0.0763283	0.21012	0.299436	0.0441294		0.22	0.15	0.15	0.35
		c29	0.472462	0.970238	0.194305	0.551325	0.970238	0.222648		0.13	0.05	0.13	0.26
		c30	0.233003	0.340481	0.0711829	0.181388	0.221636	0.0191327		0.23	0.15	0.12	0.38

## Sheet: Table S6
Table S6. SIRV variable gene clusters
		SIRV2 ORF name a	Annotation/Predicted function b	Reference
Variable Clusters	v1	-	DHHC zinc binding domain ( pfam01529) , cell division protein GpsB (PRK14127)	CD-Search
	v2	-	-	CD-Search
	v3	-	-	CD-Search
	v4	-		CD-Search
	v5	-	Hypothetical protein (PHA00731)	CD-Search
	v6	-	ATP dependent DNA ligase domain (pfam01068)	CD-Search
	v7	-	-	CD-Search
	v8	-	-	CD-Search
	v9	-	-	CD-Search
	v10	-	-	CD-Search
	v11	-	-	CD-Search
	v12	-	-	CD-Search
	v13	-	-	CD-Search
	v14	-	N-acetyl-D-glucosamine kinase (PRK13310)	CD-Search
	v15	-	-	CD-Search
	v16	-	-	CD-Search
	v17	-	-	CD-Search
	v18	-	Hypothetical protein ( PHA01635)	CD-Search
	v19	ORF158b	dUTPase	[55]
	v20	-	-	CD-Search
	v21	-	-	CD-Search
	v22	-	-	CD-Search
	v23	-	-	CD-Search
	v24	-	-	CD-Search
	v25	-	-	CD-Search
	v26	-	-	CD-Search
	v27	-	-	CD-Search
	v28	-	-	CD-Search
	v29	-	-	CD-Search
	v30	-	-	CD-Search
	v31	-	-	CD-Search
	v32	-	-	CD-Search
	v33	-	-	CD-Search
	v34	-	-	CD-Search
	v35	-	-	CD-Search
	v36	-	-	CD-Search
	v37	-	-	CD-Search
	v38	-	-	CD-Search
	v39	ORF105b	Hypothetical protein (PHA02590)	CD-Search
	v40	ORF91	Hypothetical protein (PHA01365)	CD-Search
	v41	ORF64	Hypothetical protein (PHA01632)	CD-Search
	v42	ORF114	DNA binding protein	[23, 56]
	v43	ORF112	Hypothetical protein (PHA02773)	CD-Search
	v44	ORF73	Hypothetical protein ( PHA02766)	CD-Search
	v45	ORF95	Hypothetical protein (PHA02772)	CD-Search
	v46	ORF94	Hypothetical protein (PHA02771 )	CD-Search
	v47	ORF105a	Hypothetical protein (PHA01624)	CD-Search
	v48	ORF102	Hypothetical protein (PHA02763)	CD-Search
	v49	ORF62a	Hypothetical protein (PHA02762)	CD-Search
	v50	-	-	CD-Search
	v51	ORF119b	Protein of unknown function (pfam07118)	CD-Search
	v52	ORF103a	Protein of unknown function (pfam07118)	CD-Search
	v53	ORF116	Hypothetical protein (PHA02590)	CD-Search
	v54	ORF119a	-	CD-Search
	v55	ORF90	-	CD-Search
	v56	ORF109	-	CD-Search
	v57	ORF131a	-	CD-Search
	v58	ORF103b	-	CD-Search
	v59	ORF111	-	CD-Search
	v60	ORF156	Prefoldin subunit (pfam01920)	CD-Search
	v61	ORF108	-	CD-Search
	v62	-	-	CD-Search
	a Name of corresponding ORFs in the SIRV type strain SIRV2 (if present) as described in [22]. Some ORFs vary slightly from original prediction.
	b CD-Search specific and non-specific hits are shown if at least one of the cluster members has any significant matches. Non-specific hits meet or exceed the RPS-BLAST threshold for statistical significance using the default E-value cutoff of 0.01.

## Sheet: Table S7
Table S7. CRISPR spacer matches of S. islandicus strains against SIRVs with and without a Protospacer associated motif (PAM).
			M.16.27	M.16.4		LAL14	HVE14	REY15		L.S.2.15	L.D.8.5		Y.N.15.51	Y.G.57.14	Y.08.82.36
SIRV11	PAM +	100% ID				1					1		3	1
		> 50% ID				2	6	5		6	4		5	2	1
	PAM -	100% ID						1		1	3				9
		>50% ID	11	8		16	23	21		14	16		13	5	29
SIRV4	PAM +	100% ID				1					1		3	1
		> 50% ID	1				4	5		6	5		3	1	1
	PAM -	100% ID								1	1		1		7
		>50% ID	13	7		17	28	22		19	26		13	3	32
SIRV5	PAM +	100% ID									1		2	2
		> 50% ID		1		3	4	6		8	3		8	1
	PAM -	100% ID					2	2		3	3		1		9
		>50% ID	14	8		2	28	21		21	31		11	4	33
SIRV6	PAM +	100% ID									1		2	2
		> 50% ID	1			3	4	3		8	5		7	1
	PAM -	100% ID					2	2		4	3		1		9
		>50% ID	18	9		19	28	22		21	24		12	4	39
SIRV7	PAM +	100% ID									1		2	2
		> 50% ID		1		3	5	3		8	3		8	1	1
	PAM -	100% ID					2	2		3	3		1	1	8
		>50% ID	21	7		19	23	2		19	29		13	2	32
SIRV8	PAM +	100% ID						1			2		5	2
		> 50% ID	1			2	2	4		4	3		3	1
	PAM -	100% ID					2	1			3		1	1	11
		>50% ID	14	7		25	19	16		25	22		14	2	3
SIRV9	PAM +	100% ID					1				2		5	2
		> 50% ID				4	4	5		7	3		4	1
	PAM -	100% ID					2	1			3				11
		>50% ID	19	5		23	18	24		15	27		17	4	35
SIRV10	PAM +	100% ID								1	2		4	1
		> 50% ID				2	1	5		8	6		4	1
	PAM -	100% ID					2	2			1				12
		>50% ID	13	7		1	23	18		16	21		12	2	28

## Sheet: Table S8
	Table S8. Estimates of synonymous vs. non-synonymous substitutions and evolutionary divergenge between S. islandicus sequences of two loci implicated in SIRV resistance in S. solfataricus.
		PN/PS a				Average Pairwise genetic distance b
		All				All	Within Groups				Between Groups
		PN/PS (Average)	Max	Stdev			YN	L	K	I	K/YN	K/L	K/I	YN/L	YN/I	L/I
	sso2386	0.0819083	0.466667	0.0693194		0.06	0	0	0	0	0.12	0.12	0.12	0	0	0
	sso2387	0.0827351	0.566038	0.0670608		0.04	0	0	0	0	0.09	0.09	0.09	0	0	0
	sso3138	0.295879	0.59366	0.112129		0.11	0	0.02	0	0	0.22	0.23	0.22	0.02	0.02	0.03
	sso3139	0.405443	1.73394	0.202381		0.05	0	0	0.01	0.02	0.09	0.09	0.12	0.01	0.04	0.04
	sso3140	0.561846	0.816092	0.136534		0.04	0.02	0.01	0.01	0.03	0.05	0.07	0.06	0.03	0.05	0.05
	sso3141	0.280732	0.635135	0.148279		0.01	0.01	0.01	0	0	0.01	0.01	0.03	0.01	0.02	0.02
	YN- Yellowstone National Park, L - Lassen National Park, K- Kamchatka , I- Iceland

## Sheet: Table S9
	Table S9. Estimates of synonymous vs. non-synonymous substitutions between sequences SIRV variable clusters with 5 or more representatives.
			PN/PS
			All
			PN/PS (Average)	Max	Stdev
	Variable Clusters with 5 or more representatives	v1	0.255264	0.535845	0.141668
		v2	0.681653	0.898814	0.221377
		v3	0.351526	0.483628	0.0620698
		v4	0.581872	0.924138	0.236629
		v5	0.7811	3.16484	0.921694
		v6	0.174844	0.265038	0.0581003
		v7	0.122671	0.197374	0.075515
		v8	0.532416	0.662868	0.142265
		v9	0.268898	0.331485	0.0407324
		v10	0.399	0.508376	0.0876806
		v11	0.411202	0.592397	0.125364
		v12	0.431382	0.821429	0.182343
		v13	0.29868	0.448133	0.200411
		v14	0.493985	1.52809	0.336854
		v15	0.242716	0.346667	0.11122
		v16	0.462406	0.694064	0.255567
		v17	0.431601	0.503463	0.0709852
		v18	0.127819	0.152034	0.025068
		v19	0.434069	0.527299	0.131605
		v20	NA	-	-
		v21	0.232334	0.381356	0.108087
		v22	0.531974	0.531974	0
		v23	0.353695	0.443856	0.0644202
